# Supplementary material
Source: PubMed Central journal article supplement (PMC5655100)
Supplement: AAC.01102-17_zac011176620s1.pdf [file AAC.01102-17_zac011176620s1.pdf]

1 **TABLE 1** *Candida glabrata* isolates (N34) having known genotypic, phenotypic, or clinical resistance to echinocandins, matched by year of recovery  
 2 to *C. glabrata* blood isolates (N=34) without known resistance

| <i>C. glabrata</i> with FKS1 or FKS2 mutations or phenotypic or clinical resistance |        |        |        |        |         |              | <i>C. glabrata</i> isolate matched by year of recovery |      |        |        |      |         |
|-------------------------------------------------------------------------------------|--------|--------|--------|--------|---------|--------------|--------------------------------------------------------|------|--------|--------|------|---------|
| MIC (µg/ml)                                                                         |        |        |        |        |         | FKS Mutation | MIC (µg/ml)                                            |      |        |        |      |         |
| FLC                                                                                 | ANF    | MCF    | CAS    | VRC    | SCY-078 |              | F                                                      | ANF  | MCF    | CAS    | VRC  | SCY-078 |
| 1                                                                                   | 0.03   | 0.03   | ≤0.015 | ≤0.015 | 1       | None         | 16                                                     | 0.03 | <0.015 | 0.03   | 0.5  | 0.25    |
| 4                                                                                   | 0.5    | 0.5    | 0.12   | 0.12   | 0.25    | None         | 8                                                      | 0.03 | ≤0.015 | ≤0.015 | 0.5  | 0.25    |
| 2                                                                                   | 0.25   | 0.03   | 0.12   | 0.12   | 0.25    | None         | 4                                                      | 0.03 | ≤0.015 | ≤0.015 | 0.25 | 0.25    |
| 16                                                                                  | 0.12   | 0.25   | 0.03   | 0.5    | 0.25    | None         | 16                                                     | 0.06 | ≤0.015 | ≤0.015 | 1    | 0.25    |
| 64                                                                                  | 0.06   | ≤0.015 | ≤0.015 | 1      | 0.25    | None         | 16                                                     | 0.03 | ≤0.015 | ≤0.015 | 0.5  | 0.25    |
| 4                                                                                   | 1      | 1      | 1      | 0.12   | 4       | None         | 8                                                      | 0.03 | ≤0.015 | ≤0.015 | 0.25 | 0.25    |
| 4                                                                                   | ≤0.015 | 0.12   | 0.03   | 0.25   | 0.25    | None         | 8                                                      | 0.03 | ≤0.015 | ≤0.015 | 0.12 | 0.25    |
| 16                                                                                  | 0.03   | ≤0.015 | ≤0.015 | 0.5    | 0.5     | 1-I634V      | >128                                                   | 0.12 | 0.06   | 0.12   | 8    | 1       |
| 8                                                                                   | 0.03   | ≤0.015 | ≤0.015 | 0.5    | 0.5     | 1-I634V      | 8                                                      | 0.03 | ≤0.015 | ≤0.015 | 0.25 | 0.25    |
| 8                                                                                   | 0.03   | ≤0.015 | ≤0.015 | 0.5    | 0.5     | 1-I634V      | 4                                                      | 0.03 | ≤0.015 | ≤0.015 | 0.25 | 0.5     |
| 4                                                                                   | 0.03   | ≤0.015 | ≤0.015 | 0.12   | 0.5     | 1-I634V      | 4                                                      | 0.06 | ≤0.015 | 0.03   | 0.25 | 0.5     |
| 128                                                                                 | 0.06   | 0.06   | 0.03   | 4      | 0.5     | 1-R631G      | >128                                                   | 0.12 | 0.06   | 0.12   | 16   | 1       |
| 16                                                                                  | 1      | 0.5    | 1      | 1      | 4       | 1-F625S      | 16                                                     | 0.06 | ≤0.015 | 0.03   | 1    | 0.5     |
| 64                                                                                  | 1      | 0.25   | 1      | 4      | 4       | 1-F625S      | 128                                                    | 0.06 | ≤0.015 | ≤0.015 | 4    | 0.5     |
| 128                                                                                 | 2      | 2      | 16     | 4      | 0.5     | 1-S629P      | 4                                                      | 0.06 | ≤0.015 | 0.03   | 0.06 | 0.5     |
| >128                                                                                | 1      | 0.25   | 1      | 1      | 2       | 1-D632E      | 16                                                     | 0.12 | 0.12   | 0.25   | 0.5  | 1       |
| 128                                                                                 | 1      | 0.12   | 0.5    | 4      | 1       | 1-D632E      | 16                                                     | 0.03 | ≤0.015 | ≤0.015 | 0.5  | 0.5     |
| 32                                                                                  | 0.03   | 0.03   | 0.12   | 1      | 0.5     | 2-S663P      | 4                                                      | 0.06 | ≤0.015 | 0.03   | 0.25 | 0.25    |
| >128                                                                                | 2      | 2      | 8      | 4      | 1       | 2-S663P      | 32                                                     | 0.03 | ≤0.015 | ≤0.015 | 1    | 0.25    |
| 4                                                                                   | 2      | 2      | 8      | 0.25   | 0.5     | 2-S663P      | 16                                                     | 0.06 | ≤0.015 | ≤0.015 | 0.5  | 0.25    |
| 32                                                                                  | 0.25   | 1      | 0.25   | 2      | 0.25    | 2-S663P      | 128                                                    | 0.06 | 0.03   | 0.03   | 4    | 0.5     |
| >128                                                                                | 4      | 4      | 16     | 8      | 2       | 2-S663P      | 8                                                      | 0.03 | ≤0.015 | 0.03   | 0.5  | 0.5     |
| 16                                                                                  | 2      | 2      | 4      | 0.25   | 0.5     | 2-S663P      | >128                                                   | 0.06 | 0.06   | 0.06   | 4    | 0.25    |
| 4                                                                                   | 2      | 1      | 1      | 0.5    | 0.5     | 2-S663P      | 4                                                      | 0.06 | 0.03   | 0.06   | 0.5  | 0.5     |
| 8                                                                                   | 1      | 0.25   | 0.5    | 0.25   | 0.25    | 2-S663F      | 8                                                      | 0.03 | ≤0.015 | ≤0.015 | 0.25 | 0.25    |
| 16                                                                                  | 0.12   | 0.25   | 0.5    | 4      | 0.5     | 2-R665G      | 4                                                      | 0.06 | ≤0.015 | 0.03   | 1    | 0.25    |
| 128                                                                                 | 0.06   | 0.12   | 0.25   | 4      | 0.25    | 2-R665S      | 16                                                     | 0.06 | ≤0.015 | ≤0.015 | 0.5  | 0.25    |
| 8                                                                                   | 0.25   | 0.06   | 0.5    | 0.5    | 0.25    | 2-P667T      | 8                                                      | 0.12 | ≤0.015 | 0.06   | 0.5  | 0.5     |

|    |      |        |        |      |     |            |     |        |        |        |      |      |
|----|------|--------|--------|------|-----|------------|-----|--------|--------|--------|------|------|
| 32 | 0.5  | 0.03   | 2      | 1    | 4   | 2-F659V    | 8   | 0.06   | ≤0.015 | ≤0.015 | 0.5  | 0.5  |
| 16 | 0.5  | 0.06   | 1      | 0.5  | 4   | 2-F659V    | 16  | 0.03   | ≤0.015 | ≤0.015 | 0.5  | 0.5  |
| 8  | 0.06 | ≤0.015 | 0.03   | 0.25 | 1   | 2-I1379V   | 128 | 0.03   | 0.03   | 0.03   | 2    | 0.5  |
| 4  | 0.03 | ≤0.015 | ≤0.015 | 0.12 | 0.5 | 2-I1379V   | 4   | ≤0.015 | ≤0.015 | ≤0.015 | 0.12 | 0.5  |
| 4  | 1    | 1      | 2      | 0.25 | 4   | 2-delF658  | 32  | 0.06   | ≤0.015 | ≤0.015 | 1    | 0.5  |
| 8  | 2    | 4      | >16    | 0.12 | 1   | Not tested | 4   | 0.03   | ≤0.015 | 0.03   | 0.25 | 0.25 |

3

4 Non-susceptible (intermediate or resistant) echinocandin results are highlighted; the “susceptible” breakpoint for ANF and CAS is ≤0.12µg/ml, and ≤0.06µg/ml  
5 for MCF; there is no voriconazole breakpoint for *C. glabrata*; for FLC, MICs of ≤32µg/ml and ≥64µg/mL are considered susceptible dose-dependent and  
6 resistant, respectively, for *C. glabrata*.

7 Caspofungin (CAS), Fluconazole (FLC), micafungin (MCF), anidulafungin (ANF), voriconazole (VRC).

8 All drugs were tested via Clinical Laboratory Standards Institute broth microdilution method within concentrations ranging from 0.015µg/ml to 16µg/ml, except  
9 for fluconazole which ranged in concentration from 0.125µg/ml to 128µg/ml.

10

**TABLE 2** MIC results and summary statistics for non-*glabrata* *Candida* isolates having known genotypic, phenotypic or clinical resistance

| <i>Candida</i> species      | MIC (µg/ml)    |        |        |        |        |         | FKS Mutation |
|-----------------------------|----------------|--------|--------|--------|--------|---------|--------------|
|                             | FLC            | ANF    | MCF    | CAS    | VRC    | SCY-078 |              |
| <i>Candida parapsilosis</i> | 0.5            | 4      | 2      | 0.25   | ≤0.015 | 0.5     | None         |
| <i>Candida parapsilosis</i> | 4              | 2      | 2      | 0.5    | 0.12   | 0.5     | None         |
| <i>Candida parapsilosis</i> | 0.5            | 2      | 1      | 0.25   | 0.03   | 0.5     | None         |
| <i>Candida parapsilosis</i> | 1              | 1      | 0.5    | 0.06   | 0.12   | 0.25    | None         |
| <i>Candida parapsilosis</i> | 8              | 1      | 0.5    | 0.12   | 0.06   | 0.5     | None         |
| <i>Candida parapsilosis</i> | 1              | 0.5    | 0.5    | 0.12   | ≤0.015 | 0.12    | None         |
| <i>Candida tropicalis</i>   | 0.5            | ≤0.015 | 0.03   | <0.015 | 0.03   | 0.06    | None         |
| <i>Candida tropicalis</i>   | 64             | 0.5    | 1      | 2      | 0.03   | 0.25    | 1-S645S/P    |
| <i>Candida albicans</i>     | 0.25           | ≤0.015 | ≤0.015 | ≤0.015 | 4      | 0.06    | Not tested   |
| <i>Candida krusei</i>       | 32             | 0.03   | 0.12   | 0.12   | 0.25   | 0.5     | 1-H675H/Q    |
| Summary Statistics          |                |        |        |        |        |         |              |
|                             | GEOMETRIC MEAN | 2      | 0.34   | 0.34   | 0.13   | 0.07    | 0.24         |
|                             | MODE           | 0.5    | 2      | 0.5    | 0.12   | 0.03    | 0.5          |
|                             | MEDIAN         | 1      | 0.75   | 0.5    | 0.12   | 0.05    | 0.37         |
|                             |                |        |        |        |        |         |              |

Caspofungin (CAS), Fluconazole (FLC), micafungin (MCF), anidulafungin (ANF), voriconazole (VRC).

Non-susceptible (intermediate or resistant) echinocandin MIC results are highlighted; *Candida krusei* is considered intrinsically resistant to FLC.

All drugs were tested via Clinical Laboratory Standards Institute broth microdilution method within concentrations ranging from 0.015µg/mL to 16µg/ml, except for fluconazole which ranged in concentration from 0.125µg/ml to 128µg/ml.

**TABLE 3** MIC results for 101 consecutive *Candida* isolates recovered from blood in 2013

| Species                              | MIC ( $\mu\text{g/ml}$ ) |              |              |              |              |         |
|--------------------------------------|--------------------------|--------------|--------------|--------------|--------------|---------|
|                                      | FLC                      | ANF          | MCF          | CAS          | VRC          | SCY-078 |
| <i>Candida albicans</i>              | 16                       | 0.03         | 0.03         | 0.03         | 0.06         | 0.06    |
| <i>Candida albicans</i>              | 0.25                     | $\leq 0.015$ | $\leq 0.015$ | $\leq 0.015$ | 0.12         | 0.06    |
| <i>Candida albicans</i>              | 0.5                      | $\leq 0.015$ | $\leq 0.015$ | $\leq 0.015$ | $\leq 0.015$ | 0.12    |
| <i>Candida albicans</i>              | 0.25                     | 0.03         | $\leq 0.015$ | $\leq 0.015$ | >16          | 0.12    |
| <i>Candida albicans</i>              | >128                     | 0.06         | 0.06         | 0.06         | >16          | 0.25    |
| <i>Candida albicans</i>              | 0.5                      | $\leq 0.015$ | $\leq 0.015$ | $\leq 0.015$ | 0.06         | 0.06    |
| <i>Candida albicans</i>              | 0.25                     | $\leq 0.015$ | $\leq 0.015$ | $\leq 0.015$ | 0.03         | 0.12    |
| <i>Candida albicans</i>              | 0.25                     | $\leq 0.015$ | $\leq 0.015$ | $\leq 0.015$ | $\leq 0.015$ | 0.12    |
| <i>Candida albicans</i>              | 0.5                      | $\leq 0.015$ | $\leq 0.015$ | $\leq 0.015$ | $\leq 0.015$ | 0.06    |
| <i>Candida albicans</i>              | 0.5                      | 1            | 1            | 0.5          | 0.03         | 0.25    |
| <i>Candida albicans</i>              | 8                        | $\leq 0.015$ | $\leq 0.015$ | $\leq 0.015$ | 1            | 0.06    |
| <i>Candida albicans</i>              | 1                        | $\leq 0.015$ | 0.06         | 0.06         | 0.03         | 0.12    |
| <i>Candida albicans</i>              | 0.25                     | $\leq 0.015$ | $\leq 0.015$ | $\leq 0.015$ | $\leq 0.015$ | 0.06    |
| <i>Candida albicans</i>              | 0.125                    | $\leq 0.015$ | 0.03         | <0.015       | <0.015       | 0.06    |
| <i>Candida albicans</i>              | 0.5                      | $\leq 0.015$ | 0.03         | 0.03         | <0.015       | 0.06    |
| <i>Candida albicans</i>              | 0.5                      | $\leq 0.015$ | $\leq 0.015$ | $\leq 0.015$ | 0.25         | 0.06    |
| <i>Candida albicans</i>              | 2                        | $\leq 0.015$ | $\leq 0.015$ | $\leq 0.015$ | 0.06         | 0.06    |
| <i>Candida albicans</i>              | 0.25                     | $\leq 0.015$ | $\leq 0.015$ | $\leq 0.015$ | 0.03         | 0.06    |
| <i>Candida albicans</i>              | >128                     | $\leq 0.015$ | $\leq 0.015$ | $\leq 0.015$ | 0.06         | 0.12    |
| <i>Candida albicans</i>              | 8                        | $\leq 0.015$ | $\leq 0.015$ | $\leq 0.015$ | <0.015       | 0.12    |
| <i>Candida albicans</i>              | >128                     | $\leq 0.015$ | $\leq 0.015$ | $\leq 0.015$ | <0.015       | 0.06    |
| <i>Candida albicans</i>              | 4                        | $\leq 0.015$ | $\leq 0.015$ | $\leq 0.015$ | >16          | 0.06    |
| <i>Candida albicans</i>              | <0.125                   | $\leq 0.015$ | $\leq 0.015$ | $\leq 0.015$ | 0.03         | 0.06    |
| <i>Candida albicans</i>              | 0.25                     | $\leq 0.015$ | $\leq 0.015$ | $\leq 0.015$ | >16          | 0.06    |
| <i>Candida albicans</i>              | 16                       | 0.06         | 0.03         | 0.03         | $\leq 0.015$ | 0.12    |
| <i>Candida albicans</i>              | >128                     | $\leq 0.015$ | $\leq 0.015$ | $\leq 0.015$ | $\leq 0.015$ | 0.06    |
| <i>Candida albicans</i>              | 4                        | $\leq 0.015$ | $\leq 0.015$ | $\leq 0.015$ | 0.06         | 0.06    |
| <i>Candida albicans</i>              | 1                        | $\leq 0.015$ | $\leq 0.015$ | $\leq 0.015$ | 0.5          | 0.06    |
| <i>Candida albicans</i>              | 0.5                      | $\leq 0.015$ | $\leq 0.015$ | $\leq 0.015$ | 0.5          | 0.06    |
| <i>Candida albicans</i>              | 0.5                      | $\leq 0.015$ | $\leq 0.015$ | $\leq 0.015$ | 0.03         | 0.12    |
| <i>Candida albicans</i>              | 0.25                     | 0.03         | 0.06         | 0.06         | $\leq 0.015$ | 0.12    |
| <i>Candida albicans</i>              | 2                        | 0.03         | 0.03         | $\leq 0.015$ | $\leq 0.015$ | 0.06    |
| <i>Candida albicans</i>              | 0.25                     | $\leq 0.015$ | $\leq 0.015$ | $\leq 0.015$ | $\leq 0.015$ | 0.06    |
| <i>Candida dubliniensis/albicans</i> | 0.25                     | $\leq 0.015$ | $\leq 0.015$ | $\leq 0.015$ | $\leq 0.015$ | 0.12    |
| <i>Candida dubliniensis/albicans</i> | 0.25                     | 0.03         | 0.03         | $\leq 0.015$ | $\leq 0.015$ | 0.12    |
| <i>Candida dubliniensis/albicans</i> | 0.25                     | $\leq 0.015$ | 0.03         | $\leq 0.015$ | $\leq 0.015$ | 0.12    |

|                                      |        |        |        |        |        |      |
|--------------------------------------|--------|--------|--------|--------|--------|------|
| <i>Candida dubliniensis/albicans</i> | 0.25   | ≤0.015 | 0.03   | ≤0.015 | ≤0.015 | 0.12 |
| <i>Candida dubliniensis/albicans</i> | <0.125 | ≤0.015 | 0.03   | 0.03   | ≤0.015 | 0.12 |
| <i>Candida glabrata</i>              | 2      | 0.06   | ≤0.015 | 0.06   | 1      | 0.5  |
| <i>Candida glabrata</i>              | 16     | 0.03   | ≤0.015 | ≤0.015 | 0.25   | 0.25 |
| <i>Candida glabrata</i>              | 8      | 0.03   | ≤0.015 | ≤0.015 | 0.12   | 0.25 |
| <i>Candida glabrata</i>              | 64     | 0.03   | ≤0.015 | ≤0.015 | 1      | 0.25 |
| <i>Candida glabrata</i>              | 64     | 0.03   | ≤0.015 | ≤0.015 | 1      | 0.25 |
| <i>Candida glabrata</i>              | 8      | 0.12   | ≤0.015 | 0.03   | 0.25   | 1    |
| <i>Candida glabrata</i>              | 8      | 0.06   | ≤0.015 | ≤0.015 | 0.25   | 0.25 |
| <i>Candida glabrata</i>              | 4      | 0.03   | ≤0.015 | ≤0.015 | 0.12   | 0.25 |
| <i>Candida glabrata</i>              | 2      | 0.03   | ≤0.015 | ≤0.015 | 0.03   | 0.25 |
| <i>Candida glabrata</i>              | 8      | 0.06   | ≤0.015 | ≤0.015 | 0.25   | 0.25 |
| <i>Candida glabrata</i>              | 4      | 0.06   | ≤0.015 | 0.03   | 0.12   | 1    |
| <i>Candida glabrata</i>              | 4      | 0.03   | ≤0.015 | ≤0.015 | 0.06   | 0.25 |
| <i>Candida glabrata</i>              | 64     | 0.03   | ≤0.015 | ≤0.015 | 1      | 0.25 |
| <i>Candida glabrata</i>              | 32     | 1      | 0.5    | 0.5    | 1      | 1    |
| <i>Candida glabrata</i>              | 16     | 0.03   | ≤0.015 | ≤0.015 | 0.5    | 0.25 |
| <i>Candida glabrata</i>              | 16     | 0.06   | ≤0.015 | ≤0.015 | 0.5    | 0.5  |
| <i>Candida glabrata</i>              | 4      | 0.03   | ≤0.015 | 0.03   | 0.25   | 0.25 |
| <i>Candida glabrata</i>              | >128   | 0.06   | ≤0.015 | ≤0.015 | 8      | 0.5  |
| <i>Candida glabrata</i>              | 8      | 0.03   | ≤0.015 | 0.03   | 0.25   | 0.5  |
| <i>Candida glabrata</i>              | 8      | 0.03   | ≤0.015 | 0.03   | 0.25   | 0.5  |
| <i>Candida glabrata</i>              | 16     | 0.03   | ≤0.015 | ≤0.015 | 0.25   | 0.25 |
| <i>Candida glabrata</i>              | 8      | 0.06   | ≤0.015 | 0.03   | 0.12   | 0.5  |
| <i>Candida glabrata</i>              | 4      | 0.03   | ≤0.015 | 0.03   | 0.12   | 0.25 |
| <i>Candida krusei</i>                | 64     | 0.03   | 0.12   | 0.12   | 0.5    | 1    |
| <i>Candida krusei</i>                | 64     | 0.25   | 0.25   | 0.5    | 0.5    | 4    |
| <i>Candida krusei</i>                | 32     | 0.03   | 0.12   | 0.06   | 0.5    | 0.5  |
| <i>Candida krusei</i>                | 128    | 0.03   | 0.12   | 0.12   | 1      | 1    |
| <i>Candida krusei</i>                | 128    | 0.03   | 0.03   | 0.06   | 1      | 0.5  |
| <i>Candida krusei</i>                | 64     | 0.03   | 0.06   | 0.06   | 0.5    | 0.5  |
| <i>Candida parapsilosis</i>          | 0.5    | 2      | 2      | 0.5    | ≤0.015 | 0.5  |
| <i>Candida parapsilosis</i>          | 0.25   | 2      | 2      | 0.5    | ≤0.015 | 0.5  |
| <i>Candida parapsilosis</i>          | 0.25   | 1      | 0.05   | 0.12   | ≤0.015 | 0.25 |
| <i>Candida parapsilosis</i>          | 1      | 1      | 2      | 0.12   | 0.03   | 0.25 |
| <i>Candida parapsilosis</i>          | 0.5    | 1      | 1      | 0.25   | 0.03   | 0.25 |
| <i>Candida parapsilosis</i>          | 2      | 2      | 2      | 0.5    | 0.12   | 0.25 |
| <i>Candida parapsilosis</i>          | 1      | 1      | 2      | 0.25   | 0.06   | 0.25 |
| <i>Candida parapsilosis</i>          | 4      | 1      | 1      | 0.25   | ≤0.015 | 0.25 |
| <i>Candida parapsilosis</i>          | 0.5    | 0.5    | 0.5    | 0.12   | 0.03   | 0.25 |
| <i>Candida parapsilosis</i>          | 0.5    | 1      | 1      | 0.25   | 0.03   | 0.25 |

|                             |      |        |        |        |        |      |
|-----------------------------|------|--------|--------|--------|--------|------|
| <i>Candida parapsilosis</i> | 0.5  | 2      | 2      | 0.25   | ≤0.015 | 0.25 |
| <i>Candida parapsilosis</i> | 0.5  | 2      | 2      | 0.25   | ≤0.015 | 0.25 |
| <i>Candida parapsilosis</i> | 1    | 0.5    | 1      | 0.25   | 0.03   | 0.25 |
| <i>Candida parapsilosis</i> | 2    | 0.5    | 0.5    | 0.25   | 0.06   | 0.25 |
| <i>Candida parapsilosis</i> | 1    | 0.5    | 0.5    | 0.06   | 0.06   | 0.25 |
| <i>Candida parapsilosis</i> | 1    | 0.06   | 1      | 0.25   | 0.03   | 0.25 |
| <i>Candida parapsilosis</i> | 1    | 2      | 1      | 0.12   | 0.03   | 0.25 |
| <i>Candida parapsilosis</i> | 1    | 1      | 2      | 0.25   | 0.03   | 0.25 |
| <i>Candida parapsilosis</i> | 1    | 1      | 0.5    | 0.25   | ≤0.015 | 0.25 |
| <i>Candida tropicalis</i>   | 0.25 | ≤0.015 | ≤0.015 | ≤0.015 | 0.03   | 0.03 |
| <i>Candida tropicalis</i>   | 0.5  | ≤0.015 | 0.06   | 0.06   | 0.15   | 0.25 |
| <i>Candida tropicalis</i>   | 1    | ≤0.015 | 0.03   | <0.015 | ≤0.015 | 0.06 |
| <i>Candida tropicalis</i>   | 0.5  | ≤0.015 | ≤0.015 | ≤0.015 | 0.06   | 0.12 |
| <i>Candida tropicalis</i>   | 0.5  | ≤0.015 | ≤0.015 | ≤0.015 | 0.06   | 0.5  |
| <i>Candida tropicalis</i>   | 0.5  | ≤0.015 | 0.06   | 0.03   | ≤0.015 | 0.12 |
| <i>Candida tropicalis</i>   | 1    | ≤0.015 | ≤0.015 | ≤0.015 | 0.06   | 0.12 |
| <i>Candida tropicalis</i>   | 0.25 | ≤0.015 | ≤0.015 | ≤0.015 | ≤0.015 | 0.03 |
| <i>Candida tropicalis</i>   | 0.25 | ≤0.015 | ≤0.015 | ≤0.015 | 0.03   | 0.06 |
| <i>Candida tropicalis</i>   | 1    | ≤0.015 | ≤0.015 | ≤0.015 | 0.06   | 0.12 |
| <i>Candida tropicalis</i>   | 1    | ≤0.015 | ≤0.015 | ≤0.015 | 0.06   | 0.12 |
| <i>Candida tropicalis</i>   | 0.5  | ≤0.015 | 0.03   | ≤0.015 | 0.03   | 0.12 |
| <i>Candida lusitanae</i>    | 0.5  | 0.25   | 0.25   | 0.25   | ≤0.015 | 2    |
| <i>Candida lusitanae</i>    | 2    | 0.12   | 0.12   | 0.12   | ≤0.015 | 1    |
| <i>Candida lusitanae</i>    | 1    | 0.12   | 0.12   | 0.12   | ≤0.015 | 2    |

Highlighted values indicate a non-susceptible (intermediate or resistant) MIC; the “susceptible” breakpoint for ANF and CAS is ≤0.12µg/ml, and ≤0.06µg/ml for MCF; there are no VRC breakpoints for *C. glabrata*; for *Candida lusitanae* there are no breakpoints for any antifungal agent; for *C. glabrata* a FLC MIC ≤32µg/ml is considered susceptible dose-dependent and ≥64µg/ml is considered resistant; *Candida krusei* is considered intrinsically resistant to FLC.

Caspofungin (CAS), Fluconazole (FLC), micafungin (MCF), anidulafungin (ANF), voriconazole (VRC).

Isolates listed as *Candida dubliniensis/albicans* were not further identified.

All drugs were tested via Clinical Laboratory Standards Institute broth microdilution method within concentrations ranging from 0.015µg/mL to 16µg/ml, except for fluconazole which ranged in concentration from 0.125µg/ml to 128µg/ml.
